# Supplementary material
Source: publisher site journal article supplement (https://www.dovepress.com/article/357810)
Supplement: Supplementary file 1 [file get_supplementary_file.php]

Supplement Tables Paper Exokine Multicenter Study

**Table S1** Cutometry measured at baseline and weeks 12, 24 and 48.

**Table S2** Data of FACE-Q “Satisfaction with facial appearance” and “Satisfaction with skin”

**Table S3** Data of FACE-Q on “Psychological function” and “Social Function”

**Table S4** FACE-Q Data on “Satisfaction with decision” and “Satisfaction with outcome”

**Table S5** FACE-Q Data of Aging appraisal and Patient Perceived Age

**Table S6** GAIS Data

**Table S7** Attractiveness Self-Assessment

**Table S1**: Cutometry measured at baseline and weeks 12, 24 and 48. Inverse Skin Firmness (R0) and Tiring (R3) in mm. Shown are also respective differences to baseline as mean (min-max) ±SD, as well as the calculated ES and p-value.

|  |  | **Measurements mm** |  | **Difference to Baseline** | **Effect Size** | **p-Value** |
| --- | --- | --- | --- | --- | --- | --- |
| **Cutometry** | **n** | **mean ±SD** | **n** | **mean (95% CI) ±SD** |  |  |
| **R0** |  |  |  |  |  |  |
| Baseline | 95 | 0.405 ±0.0697 |  |  |  |  |
| Week 12 | 95 | 0.384 ±0.0849 | 95 | -0.0217 (-0.0354 to -0.0080) ±0.0674 | -0.32 | 0.0148 |
| Week 24 | 95 | 0.361 ±0.0886 | 95 | -0.0444 (-0.0600 to -0.0288) ±0.0766 | -0.58 | <0.0001 |
| Week 48 | 94 | 0.378 ±0.0891 | 94 | -0.0283 (-0.0448 to -0.0118) ±0.0806 | -0.35 | 0.0024 |
| **R3** |  |  |  |  |  |  |
| Baseline | 95 | 0.455 ±0.0744 |  |  |  |  |
| Week 12 | 95 | 0.428 ±0.0939 | 95 | -0.0269 (-0.0428 to -0.0110) ±0.0780 | -0.34 | 0.0064 |
| Week 24 | 95 | 0.402 ±0.0953 | 95 | -0.0529 (-0.0703 to -0.0355) ±0.0853 | -0.62 | <0.0001 |
| Week 48 | 95 | 0.418 ±0.0993 | 95 | -0.0369 (-0.0543 to -0.0194) ±0.0858 | -0.43 | 0.0005 |

**Table S2:** displays Data of FACE-Q “Satisfaction with facial appearance” and “Satisfaction with skin” at Baseline, Week 12, 24 and 48. The numbers show the score calculated by FACE-Q IFU. “Difference to baseline” is the improvement at week 12, 24 and 48. Calculated effect sizes and p-values are also shown.

|  |  | **Score** |  | **Difference to Baseline** | **Effect Size** | **p-Value** |
| --- | --- | --- | --- | --- | --- | --- |
| **FACE-Q:** | **n** | **mean ±SD** | **n** | **mean (95% CI) ±SD** |  |  |
| **Satisfaction with facial appearance (score)** |  |  |  |  |  |  |
| Baseline | 95 | 42.56 ±10.13 |  |  |  |  |
| Week 12 | 95 | 56.31 ±10.98 | 95 | 13.75 (10.75 to 16.74) ±14.70 | 0.94 | <0.0001 |
| Week 24 | 95 | 52.17 ±11.17 | 95 | 9.61 ( 6.81 to 12.42) ±13.77 | 0.70 | <0.0001 |
| Week 48 | 95 | 51.99 ±12.81 | 95 | 9.43 ( 6.50 to 12.37) ±14.40 | 0.65 | <0.0001 |
| **Satisfaction with skin (score)** |  |  |  |  |  |  |
| Baseline | 95 | 39.64 ±14.37 |  |  |  |  |
| Week 12 | 95 | 59.82 ±13.00 | 95 | 20.18 (16.35 to 24.01) ±18.81 | 1.07 | <0.0001 |
| Week 24 | 95 | 54.20 ±12.48 | 95 | 14.56 (11.06 to 18.05) ±17.15 | 0.85 | <0.0001 |
| Week 48 | 95 | 53.99 ±14.15 | 95 | 14.35 (10.90 to 17.80) ±16.95 | 0.85 | <0.0001 |

**Table S3:** displays Data of FACE-Q on “Psychological function” and “Social Function” at Baseline and weeks 12, 24 and 48. The numbers show the score calculated by FACE-Q IFU. “Difference to baseline” is the improvement at week 12, 24 and 48. Calculated effect sizes and p-values are also shown.

|  |  | **Score** |  | **Difference to Baseline** | **Effect Size** | **p-Value** |
| --- | --- | --- | --- | --- | --- | --- |
| **FACE-Q:** | **n** | **mean ±SD** | **n** | **mean (95% CI) ±SD** |  |  |
| **Psychological function (score)** |  |  |  |  |  |  |
| Baseline | 94 | 59.75 ±16.79 |  |  |  |  |
| Week 12 | 95 | 68.96 ±14.45 | 94 | 9.10 (5.86 to 12.34) ±15.82 | 0.58 | <0.0001 |
| Week 24 | 95 | 66.74 ±17.44 | 94 | 7.12 (3.60 to 10.64) ±17.19 | 0.41 | 0.0001 |
| Week 48 | 95 | 66.43 ±15.54 | 94 | 6.73 (3.09 to 10.38) ±17.78 | 0.38 | 0.0003 |
| **Social function (score)** |  |  |  |  |  |  |
| Baseline | 94 | 57.54 ±15.88 |  |  |  |  |
| Week 12 | 95 | 66.03 ±16.48 | 94 | 8.37 (5.42 to 11.33) ±14.42 | 0.58 | <0.0001 |
| Week 24 | 95 | 63.81 ±17.42 | 94 | 6.33 (3.55 to 9.11) ±13.59 | 0.47 | <0.0001 |
| Week 48 | 95 | 62.90 ±17.76 | 94 | 5.32 (2.12 to 8.51) ±15.60 | 0.34 | 0.0013 |

**Table S4:** displays FACE-Q Data on Satisfaction with decision and Satisfaction with outcome

Patients were questioned about the satisfaction with their decision to have the treatment and about the satisfaction of the outcome. The table shows this outcome at week 24 and 48.The results do not deteriorate.

|  |  | **Score** |
| --- | --- | --- |
| **FACE-Q:** | **n** | **mean ±SD** |
| **Satisfaction with decision (score)** |  |  |
| Week 24 | 95 | 56.22 ±23.08 |
| Week 48 | 94 | 56.27 ±22.13 |
| **Satisfaction with outcome (score)** |  |  |
| Week 24 | 95 | 49.67 ±21.68 |
| Week 48 | 94 | 48.79 ±22.21 |

**Table S5: FACE-Q Data of Aging appraisal and Patient Perceived Age**

The aging appraisal score is a questionnaire that aims to assess how patients feel about the age of their face. The conversion table provided by FACE-Q was used to transform the absolute numbers into score values. Higher score values reflect a better outcome.

For patient perceived age a visual analogue scale is used. Patients were asked to answer how many years older or younger they think they looked, compared to their actual age. This was repeated at week 24 and 48. The numbers show how much younger the patients think they look (in years). After 48 weeks people think they look 1.68 years younger compared to baseline (ES=0.47. p<0.0001).

|  |  | **Score** |  | **Difference to Baseline** | **Effect Size** | **p-Value** |
| --- | --- | --- | --- | --- | --- | --- |
| **FACE-Q:** | **n** | **mean ±SD** | **n** | **mean (95% CI) ±SD** |  |  |
| **Aging appraisal (score)** |  |  |  |  |  |  |
| Baseline | 95 | 52.94 ±16.43 |  |  |  |  |
| Week 24 | 95 | 62.34 ±16.85 | 95 | 9.40 (5.66 to 13.14) ±18.36 | 0.51 | <0.0001 |
| Week 48 | 95 | 65.23 ±18.03 | 95 | 12.3 (8.87 to 15.72) ±16.83 | 0.73 | <0.0001 |
| **Patient-perceived age (VAS)** |  |  |  |  |  |  |
| Baseline | 94 | -0.31 ±3.77 |  |  |  |  |
| Week 24 | 93 | -1.67 ±3.69 | 92 | -1.37 (-2.21 to -0.53) ±4.08 | -0.34 | 0.0004 |
| Week 48 | 88 | -2.05 ±3.59 | 87 | -1.68 (-2.44 to -0.91) ±3.58 | -0.47 | 0.0001 |

**Table S6: GAIS Data**

The Global Aesthetic Improvement Scale was used to determine how much improvement Patients and their Physicians saw of their left and their right cheek. This was asked at week 6, 12, 24 and 48. 76.8% of Patients see an improvement until week 48. 90.5% of Physicians initially see improvement. This deteriorates at week 48.

| **GAIS** | Baseline | W06 | W12 | W24 | W48 |
| --- | --- | --- | --- | --- | --- |
|  | **n (%)** | **n (%)** | **n (%)** | **n (%)** | **n (%)** |
| Total | 95 (100.0) | 95 (100.0) | 95 (100.0) | 95 (100.0) | 95 (100.0) |
| GAIS improvement* (physician) |  | 86 (90.5) | 85 (89.5) | 70 (73.7) | 56 (58.9) |
| p-value |  | p<0.0001 | p<0.0001 | p<0.0001 | p=0.1002 |
| GAIS improvement* (patient) |  | 86 (90.5) | 75 (78.9) | 71 (74.7) | 73 (76.8) |
| p-value |  | p<0.0001 | p<0.0001 | p<0.0001 | p<0.0001 |

* improvement is indicated by decreasing numbers

**Table S7: Attractiveness Self Assessment**

With the attractiveness self-assessment question patients were asked to assess their own attractivity. Patients are asked to check one of the following points: very unattractive, quite unattractive, rather unattractive, moderately attractive, rather attractive, quite attractive, very attractive. Checks were counted and %ages calculated.

Improvement was defined as patients viewing their attractiveness “rather attractive” or better. The differences to baseline demonstrate how patients’ own attractivity assessment improved. The results show significant improvement at week 12 and highly significant improvement at week 48.

* Both cheeks together. evaluation of at least improvement (2-sided binomial test with an expected probability of 0.5)

** At least "rather attractive"

*** 2-sided McNemar test with comparison to baseline

| **Attractiveness self-assessment*** | Baseline  n (%) | W12  n (%) | W24  n (%) | W48  n (%) |
| --- | --- | --- | --- | --- |
| Rather attractive or better** | 37 (39.0) | 52 (54.7) | 47 (49.5) | 61 (64.2) |
| Difference to baseline (%) |  | 16.1 (5.7 to 26.6) | 11.0 (0.2 to 21.7) | 24.7 (13.7 to 35.8) |
| p-value*** |  | p=0.0059 | p=0.0755 | p=0.0001 |
